# Supplementary material for: Omics profiling identifies the regulatory functions of the MAPK/ERK pathway in nephron progenitor metabolism
Source: Oxford University Press journal article supplement (doi:10.1242/dev.200986), 2022-10-01
Supplement: dev200986supp.pdf [file dev200986supp.pdf]

Figure 1.

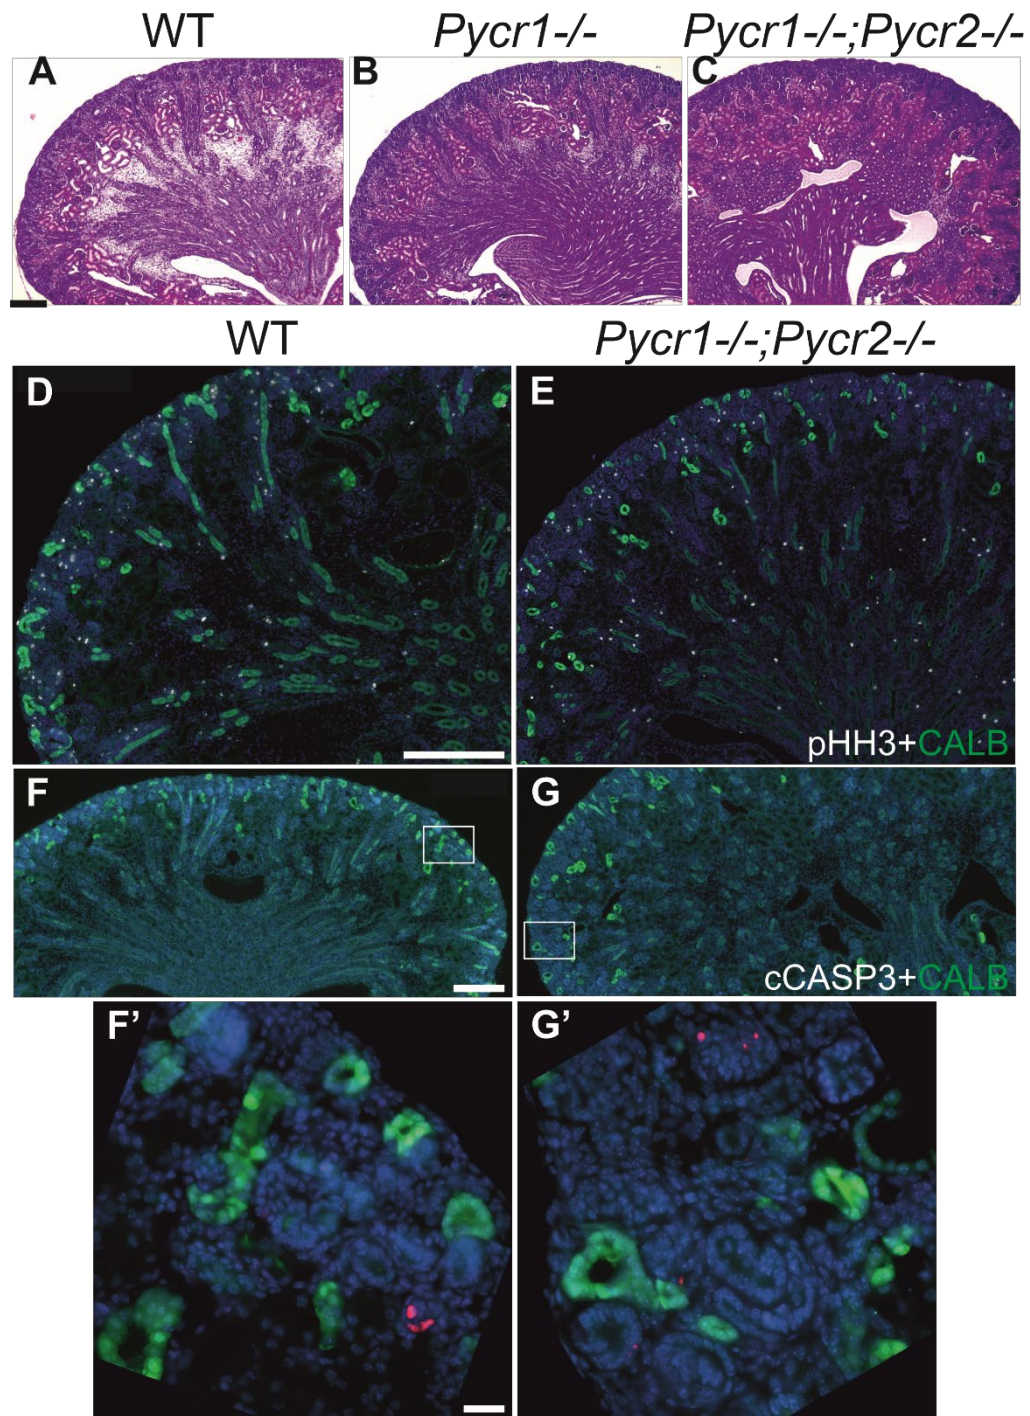

**Fig. S1. *Pycr1* and -2 knockout kidney characterization.** HE-staining of (A) wild type, (B) *Pycr1* and (C) *Pycr1*<sup>-/-</sup>;*Pycr2*<sup>-/-</sup> kidneys at postnatal day 1 (P1). Representative examples of proliferation analyses in (D) wild type (WT) and (E) *Pycr1*<sup>-/-</sup>;*Pycr2*<sup>-/-</sup> kidneys at P1 by phospho-histone H3 (white) staining. Representative examples of apoptosis detection in (F) wild type (WT) and (G) *Pycr1*<sup>-/-</sup>;*Pycr2*<sup>-/-</sup> kidneys at P1 by cleaved-Caspase 3 (white) staining. CALBINDIN (green) visualizes ureteric bud epithelium in D-G'. Squared areas indicated in F and G are shown with higher magnification in (F') and (G'). Scale bar: A-G; 200µm, F'-G'; 20µm.

**Figure 2.**

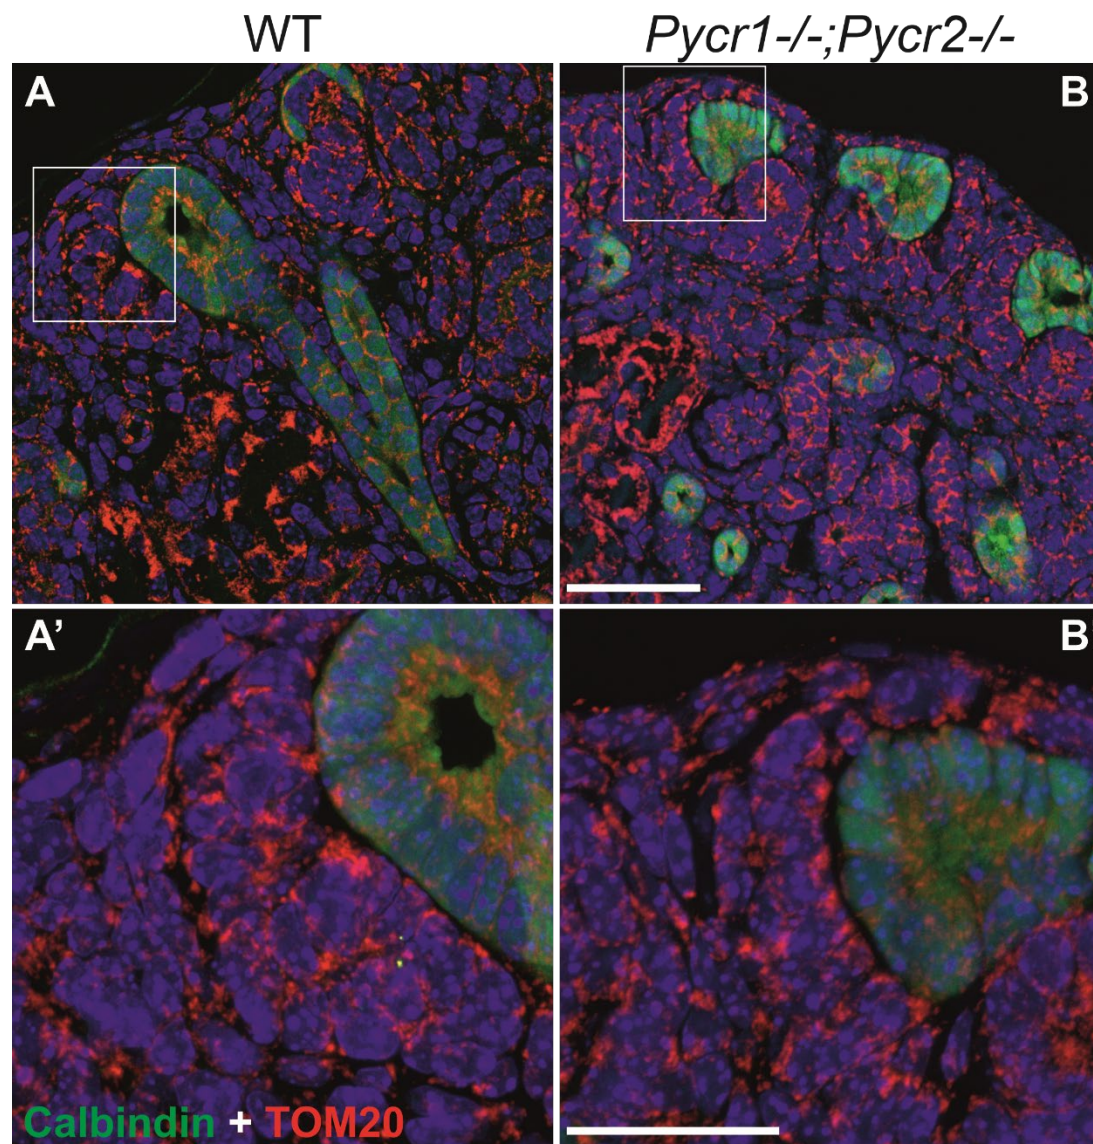

**Fig. S2. Mitochondrial morphology in nephron progenitors of *Pycr1* and -2 knockout kidney.** Representative examples of mitochondrial morphology and localization in (A) wild type (WT) and (B) *Pycr1<sup>-/-</sup>;Pycr2<sup>-/-</sup>* kidneys at P1 as visualized by TOM20 (red) staining. CALBINDIN (green) visualizes ureteric bud epithelium. Scale bar: A-B; 50µm, A'-B'; 25µm



**Table S1.** List of differentially expressed genes

[Click here to download Table S1](#)

**Table S2.** Metabolite marker identification

[Click here to download Table S2](#)

**Table S3.** Metabolic set enrichment analysis (MSEA) of identified metabolites

[Click here to download Table S3](#)

**Table S4.** The correlations between identified metabolites and differentially expressed genes

[Click here to download Table S4](#)

**Table S5.** Comparison of our transcriptional changes to scRNA-seq by Brunskill et al 2014

[Click here to download Table S5](#)

**Table S6.** Analysis of MAPK/ERK target and oxidative stress related gene expressions in MAPK/ERK-deficient nephron progenitors

[Click here to download Table S6](#)

**Table S7.** The metabolite inclusion list of parallel reaction methods

[Click here to download Table S7](#)
